**Table S1.** Coefficients, standard errors and associated *P*-values of the fixed terms of the four selected models investigating a treatment effect on bee flight activity parameters (see Table 1 for details). Intercept represents the pin prick bees.

| Dependent variable                                        | covariates    | class         | coefficient | standard error | <i>p</i> -value |
|-----------------------------------------------------------|---------------|---------------|-------------|----------------|-----------------|
| Duration of flight activity over the 35-day period (days) | intercept     |               | 2.525       | 0.0448         | < 0.001         |
|                                                           | treatment     | control       | 0.081       | 0.0393         | 0.04            |
|                                                           |               | <i>Nosema</i> | -0.332      | 0.0426         | < 0.001         |
| Total number of flights over the 35-day period (days)     | intercept     |               | 3.190       | 0.0543         | < 0.001         |
|                                                           | treatment     | control       | 0.289       | 0.0269         | < 0.001         |
|                                                           |               | <i>Nosema</i> | -0.222      | 0.0297         | < 0.001         |
| Number of flights/day                                     | intercept     |               | 0.080       | 0.0882         | 0.36            |
|                                                           | age (day)     |               | 0.052       | 0.0040         | < 0.001         |
|                                                           | treatment     | control       | -0.071      | 0.1191         | 0.55            |
|                                                           |               | <i>Nosema</i> | -0.413      | 0.1358         | 0.002           |
|                                                           | age*treatment | control       | 0.015       | 0.0053         | 0.004           |
|                                                           |               | <i>Nosema</i> | 0.044       | 0.0075         | < 0.001         |
| Duration of each flight (seconds)                         | intercept     |               | -277.86     | 365.30         | 0.46            |
|                                                           | age (day)     |               | 226.50      | 12.36          | < 0.001         |
|                                                           | treatment     | control       | -1400.32    | 397.34         | < 0.001         |
|                                                           |               | <i>Nosema</i> | -2264.79    | 434.59         | < 0.001         |
|                                                           | age*treatment | control       | 39.72       | 16.28          | 0.01            |
|                                                           |               | <i>Nosema</i> | 187.06      | 22.27          | < 0.001         |
| Duration of flight activity/day (seconds)                 | intercept     |               | -1995.71    | 1032.54        | 0.057           |
|                                                           | age (day)     |               | 677.46      | 49.64          | < 0.001         |
|                                                           | treatment     | control       | -5931.45    | 1342.99        | < 0.001         |
|                                                           |               | <i>Nosema</i> | -9737.59    | 1516.46        | < 0.001         |
|                                                           | age*treatment | control       | 467.52      | 67.03          | < 0.001         |
|                                                           |               | <i>Nosema</i> | 942.76      | 91.73          | < 0.001         |
